# Supplementary material for: N,N-Dimethylformamide-stabilized gold nanoclusters as a catalyst for the reduction of 4-nitrophenol
Source: Royal Society of Chemistry journal article supplement (doi:10.1039/c2nr30222e), 2012-01-01
Supplement: c2nr30222e.pdf [file c2nr30222e.pdf]

Supplementary Material (ESI) for Nanoscale

This journal is © The Royal Society of Chemistry 2011

## ***N,N*-Dimethylformamide-Stabilized Gold Nanoclusters as a Catalyst for the Reduction of 4-Nitrophenol**

**H. Yamamoto, H. Yano, H. Kouchi, Y. Obora, R. Arakawa, and H. Kawasaki\***

Department of Chemistry and Materials Engineering, Faculty of Chemistry, Materials and Bioengineering, Kansai University, 3-3-35 Yamate-cho; Suita-shi, Osaka 564-8680; Japan

Correspondence author:

Hideya Kawasaki

Department of Chemistry and Materials Engineering, Faculty of Chemistry, Materials and Bioengineering, Kansai University, 3-3-35 Yamate-cho; Suita-shi, Osaka 564-8680; Japan

Tel: +81 (6)6368 5647

Fax: +81 (6)6339 4026

email: hkawa@kansai-u.ac.jp

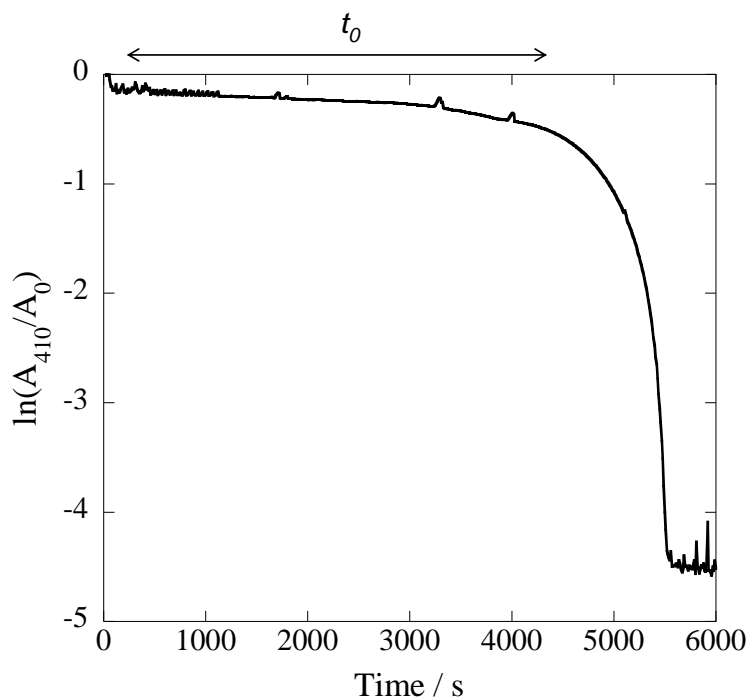

**Figure S1.** Plot of  $\ln(A_{410}/A_0)$  versus time for the reduction of PNP in water over DMF-stabilized Au NCs with an excess amount of  $\text{NaBH}_4$  in aqueous media at 298K. (Reaction conditions:  $[\text{Au}] = 1\mu\text{M}$  (based on amount of gold atoms),  $[\text{NaBH}_4] = 0.2\text{ M}$ , and  $[\text{PNP}] = 1 \times 10^{-4}\text{ M}$ . Before the experiment, we used the degassing sample solution by  $\text{N}_2$  gas.

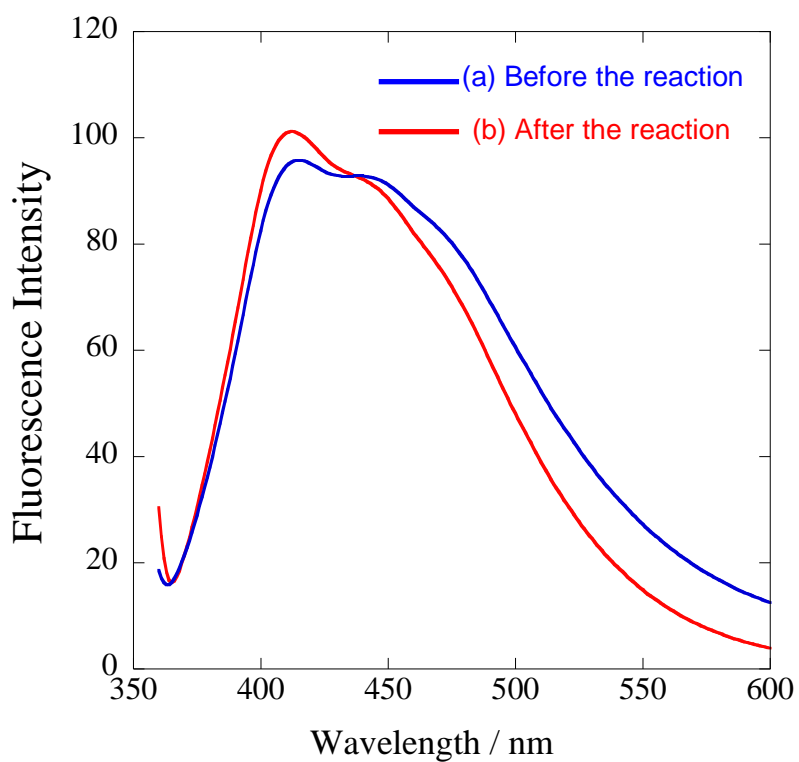

**Figure S2.** Fluorescence spectra of the DMF-stabilized Au NCs in water (a) before the reaction and (b) after the reaction.

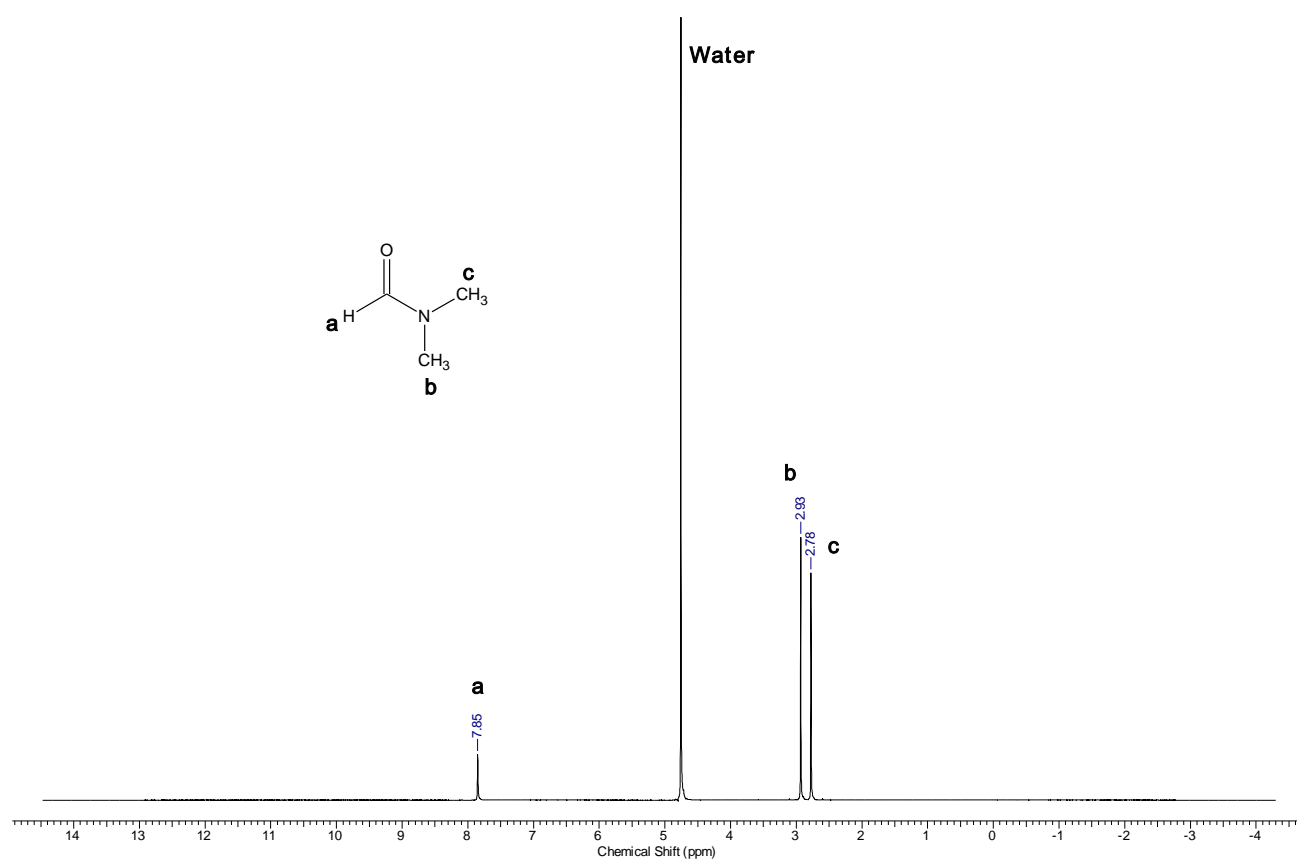

**Figure S3.** The  $\text{H}^1$ -NMR spectrum of 0.1 M DMF in  $\text{D}_2\text{O}$ .

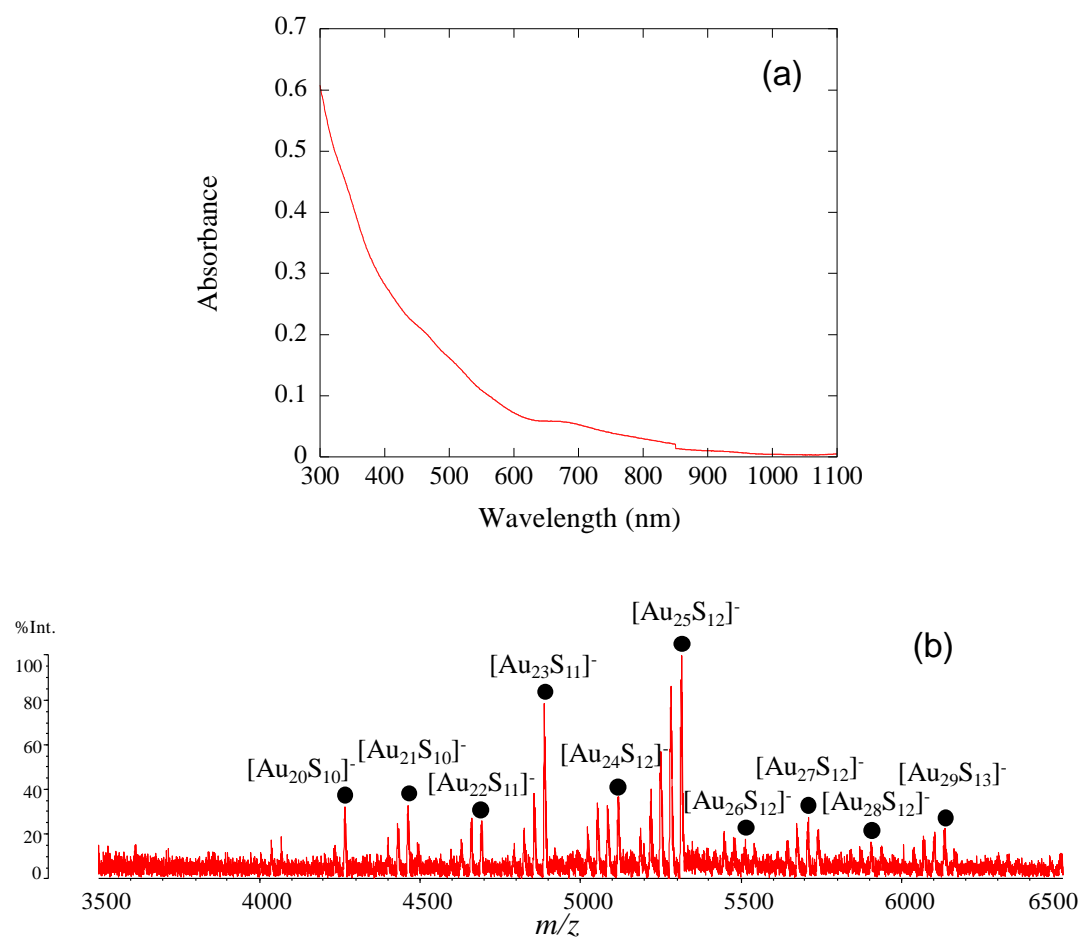

**Figure S4.** (a) UV-vis absorption spectrum in water and (b) MALDI-MS spectrum of glutathione-stabilized Au NCs :  $\text{Au}_{25}(\text{SG})_{18}$  NCs.
